# Supplementary material for: Study of the carbon cycle of a hydrogen supply system over a supported Pt catalyst: methylcyclohexane–toluene–hydrogen cycle
Source: Royal Society of Chemistry journal article supplement (doi:10.1039/c9cy01999e), 2020-01-01
Supplement: c9cy01999e1.pdf [file c9cy01999e1.pdf]

Supplementary Information

**Study on Carbon Cycle of Hydrogen Supply System over Supported Pt  
Catalyst: Methylcyclohexane-Toluene-Hydrogen Cycle**

Xiaotong Zhang, Ning He, Long Lin, Quanren Zhu, Gang Wang, Hongchen Guo\*

Department of Catalytical Chemistry and Engineering, State Key Laboratory of Fine  
Chemicals, Dalian University of Technology, Dalian 116024, Liaoning, PR China

\* Corresponding author. Tel & Fax: +86-411-84986120

Mobile: +8618698614478

E-mail: hongchenguo@163.com

**Table S1** Chemical compositions of catalysts from ICP analysis

|                        | Pt content wt% | Cu content wt% |
|------------------------|----------------|----------------|
| Pt/S-1                 | 0.34           | 0              |
| Cu/S-1                 | 0              | 0.38           |
| Cu-Pt/S-1              | 0.44           | 0.37           |
| Cu-Pt/SiO <sub>2</sub> | 1.41           | 1.41           |

**Table S2** Comparison on MCH dehydrogenation over Cu-Pt/S-1 with other Pt supported catalysts from literatures. <sup>23-30</sup>

| No. | Catalyst                                                          | Reaction conditions                                                                              | Conversion/H <sub>2</sub> evolution rate | Ref.                                                                                                                                                                                                                         |
|-----|-------------------------------------------------------------------|--------------------------------------------------------------------------------------------------|------------------------------------------|------------------------------------------------------------------------------------------------------------------------------------------------------------------------------------------------------------------------------|
| 23  | Pt/SBA-15 (Pt 3.1 wt%)                                            | T=300 °C, catalyst weight=0.05 g, WHSV =27.1 h <sup>-1</sup><br>Hydrogen was used as carrier gas | 65.0%/96.4 mmol/g <sub>Pt</sub> /min     | Chen AB, Zhang WP, Li XY, Tan DL, Han XW, Bao XH. One-pot encapsulation of Pt nanoparticles into the mesochannels of SBA-15 and their catalytic dehydrogenation of methylcyclohexane. Catal Lett. 2007;119(1-2):159-64.[1]   |
| 24  | Pt/activated carbon (Pt 1wt%)                                     | T=300 °C, catalyst weight = 0.03 g, MCH rate = 0.03 mL/min                                       | 42%/121.9 mmol/g <sub>Pt</sub> /min      | Li XY, Ma D, Bao XH. Dispersion of Pt catalysts supported on activated carbon and their catalytic performance in methylcyclohexane dehydrogenation. Chinese J Catal. 2008;29(3):259-63.[2]                                   |
| 25  | Pt/La <sub>0.7</sub> Y <sub>0.3</sub> NiO <sub>3</sub> (Pt 1 wt%) | T=350 °C, catalyst weight=0.3 g, pulse injection of MCH                                          | 14%/45.3 mmol/g <sub>Pt</sub> /min       | Shukla AA, Gosavi PV, Pande JV, Kumar VP, Chary KVR, Biniwale RB. Efficient hydrogen supply through catalytic dehydrogenation of methylcyclohexane over Pt/metal oxide catalysts. Int J Hydrog Energy. 2010;35(9):4020-6.[3] |
| 26  | Pt/pyrolytic waste tire char (Pt 0.4 wt%)                         | T=300 °C, catalyst weight =0.554 g, MCH rate =1.8 mL/h, WHSV=2.5 h <sup>-1</sup>                 | 95%/300 mmol/g <sub>Pt</sub> /min        | Zhang C, Liang XQ, Liu SX. Hydrogen production by catalytic dehydrogenation of methylcyclohexane over Pt catalysts supported on pyrolytic waste tire char. Int J                                                             |

|              |                                                     |                                                                                                          |                                           |                                                                                                                                                                                                                                                                 |
|--------------|-----------------------------------------------------|----------------------------------------------------------------------------------------------------------|-------------------------------------------|-----------------------------------------------------------------------------------------------------------------------------------------------------------------------------------------------------------------------------------------------------------------|
|              |                                                     |                                                                                                          |                                           | Hydrog Energy.<br>2011;36(15):8902-7.[4]                                                                                                                                                                                                                        |
| 27           | Pt/Mo <sub>10</sub> -SiO <sub>2</sub><br>(Pt 5 wt%) | T=400 °C, catalyst<br>weight =0.10 g,<br>WHSV=92.4 h <sup>-1</sup><br>H <sub>2</sub> pressure 2.2<br>MPa | 10%/30<br>mmol/g <sub>Pt</sub> /min       | Boufaden N, Akkari R,<br>Pawelec B, Fierro JLG, Zina<br>MS, Ghorbel A.<br>Dehydrogenation of<br>methylcyclohexane to toluene<br>over partially reduced silica-<br>supported Pt-Mo catalysts. J<br>Mol Catal a-Chem.<br>2016;420:96-106.[5]                      |
| 28           | Pt/ACC<br>(Pt 5wt%)                                 | T=350 °C spray<br>pulse reactor                                                                          | 26.8%/ 373.1<br>mmol/g <sub>Pt</sub> /min | Patil SP, Bindwal AB, Pakade<br>YB, Biniwale RB. On H <sub>2</sub><br>supply through liquid organic<br>hydrides - Effect of functional<br>groups. Int J Hydrog Energy.<br>2017;42(25):16214-24.[6]                                                              |
| 29           | PtSn-5/Mg-Al-<br>O-350<br>(Pt 2wt%)                 | T=300 °C, catalyst<br>weight =0.5 g,<br>MCH rate =0.1<br>mL/min ,<br>WHSV=9.2 h <sup>-1</sup>            | 90.5%/262.1<br>mmol/g <sub>met</sub> /min | Yan J, Wang WY, Miao L,<br>Wu K, Chen GL, Huang YP,<br>et al. Dehydrogenation of<br>methylcyclohexane over Pt-Sn<br>supported on Mg-Al mixed<br>metal oxides derived from<br>layered double hydroxides. Int<br>J Hydrog Energy.<br>2018;43(19):9343-52.[7]      |
| 30           | Pt/Ce-Mg-Al-O<br>(Pt 0.4wt%)                        | T=350 °C, catalyst<br>weight =0.5 g,<br>MCH rate =0.1<br>mL/min,<br>WHSV=9.2 h <sup>-1</sup>             | 98.5%/1358.6<br>mmol/g <sub>Pt</sub> /min | Wang W, Miao L, Wu K,<br>Chen G, Huang Y, Yang Y.<br>Hydrogen evolution in the<br>dehydrogenation of<br>methylcyclohexane over<br>Pt/Ce-Mg-Al-O catalysts<br>derived from their layered<br>double hydroxides. Int J<br>Hydrog Energy.<br>2019;44(5):2918-25.[8] |
| this<br>work | Cu-Pt/S-1<br>(Pt 0.4wt%)                            | T=400 °C, catalyst<br>weight=1.0 g,<br>MCH rate =0.1<br>mL/min, WHSV=<br>4.6 h <sup>-1</sup>             | 92%/430<br>mmol/g <sub>Pt</sub> /min      | This work                                                                                                                                                                                                                                                       |

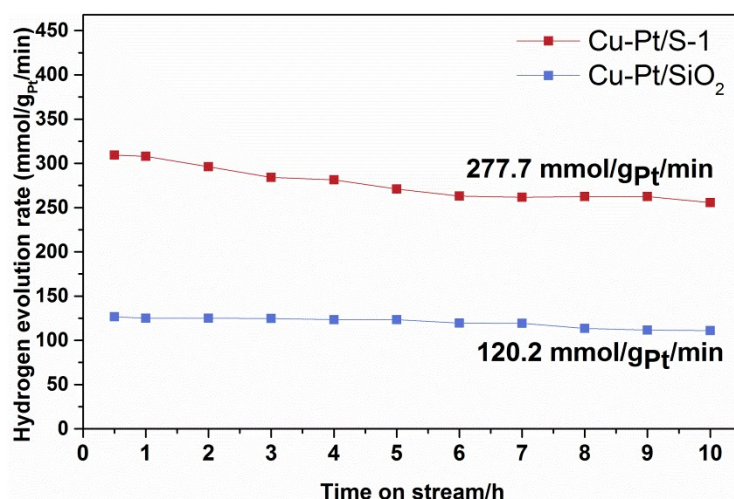

**Fig. S1** H<sub>2</sub> evolution rate over 10 hours on Cu-Pt/S-1 and Cu-Pt/SiO<sub>2</sub> (T=350 °C, P=101 KPa, WHSV=4.6 h<sup>-1</sup>).

**Table S3** Physicochemical properties of Cu-Pt/S-1 and Cu-Pt/SiO<sub>2</sub>.

| Samples                | S <sub>BET</sub> <sup>§</sup><br>(m <sup>2</sup> /g) | S <sub>micro</sub> <sup>§§</sup><br>(m <sup>2</sup> /g) | S <sub>exter</sub> <sup>§§§</sup><br>(m <sup>2</sup> /g) |
|------------------------|------------------------------------------------------|---------------------------------------------------------|----------------------------------------------------------|
| Cu-Pt/S-1              | 415.1                                                | 267.6                                                   | <b>147.5</b>                                             |
| Cu-Pt/SiO <sub>2</sub> | <b>190.1</b>                                         | 19.5                                                    | 170.5                                                    |

<sup>§</sup> The total surface area was calculated from BET method.

<sup>§§</sup> The microspore and external surface area were obtained from the t-plot method.

**Table S4.** Comparison on toluene hydrogenation over Pt/S-1 with other Pt supported catalysts from literatures based on toluene conversion and H<sub>2</sub> storage rate.<sup>13, 32-38</sup>

| Ref No. | Catalyst                   | Reaction conditions                                                     | Conversion/<br>hydrogen storage<br>rate | Ref.                                                                                                                                                                                                                       |
|---------|----------------------------|-------------------------------------------------------------------------|-----------------------------------------|----------------------------------------------------------------------------------------------------------------------------------------------------------------------------------------------------------------------------|
| 32      | Pt/CBV-780<br>(Pt 0.3 wt%) | T=120 °C,<br>toluene flow<br>rate=0.3 ml/h<br>catalyst<br>weight=0.03g, | ~100%/1574<br>mmol/g <sub>Pt</sub> /min | Thomas K, Binet C,<br>Chevreau T, Cornet D,<br>Gilson JP. Hydrogenation of<br>toluene over supported Pt and<br>Pd catalysts: Influence of<br>structural factors on the<br>sulfur tolerance. J Catal.<br>2002;212(1):63-75. |

|    |                                   |                                                                                                  |                                         |                                                                                                                                                                                                                                                             |
|----|-----------------------------------|--------------------------------------------------------------------------------------------------|-----------------------------------------|-------------------------------------------------------------------------------------------------------------------------------------------------------------------------------------------------------------------------------------------------------------|
|    |                                   | total pressure=3 MPa fixed bed                                                                   |                                         |                                                                                                                                                                                                                                                             |
| 13 | 3Pt3Pd/HBE<br>A(Pt 3wt%)          | T=150 °C,<br>catalyst<br>weight=0.07g,<br>H <sub>2</sub> /toluene=28,<br>fixed bed               | ~100%/102<br>mmol/g <sub>Pt</sub> /min  | Loiha S, Foettinger K, Zorn K, Klysubun W, Rupprechter G, Wittayakun J. Catalytic enhancement of platinum supported on zeolite beta for toluene hydrogenation by addition of palladium. Journal of Industrial and Engineering Chemistry. 2009;15(6):819-23. |
| 33 | Pt/H-Y<br>(Pt 0.8wt%)             | T=110 °C,<br>P(H <sub>2</sub> )/P(toluene)<br>= 4, fixed bed                                     | 75%/363<br>mmol/g <sub>Pt</sub> /min    | Mediavilla M, Melo L, Brito JL, Moronta D, Solano R, Gonzalez I, et al. Synthesis of Pt and Pt-Sn catalysts supported on H-Y zeolite induced by microwave radiation. Micropor Mesopor Mat. 2013; 170: 189-93.                                               |
| 34 | Pt-Pd/ Zr-<br>HMS<br>(Pt 0.15wt%) | T=225 °C,<br>catalyst<br>weight=5 g,<br>hydrogen<br>pressure =2 MPa,<br>fixed bed                | ~100%/360<br>mmol/g <sub>met</sub> /min | Roy S, Datta S. Hydrogenation of Toluene on Zirconium-Modified Hexagonal Molecular Sieve Supported Platinum and Palladium Catalysts. Ind Eng Chem Res. 2013; 52 (49): 17360-8.                                                                              |
| 35 | Pt1Ru1.5<br>(Pt 1.6wt%)           | Room<br>temperature,<br>catalyst<br>weight=0.2 g,<br>hydrogen<br>pressure=0.1<br>MPa, in ethanol | 85%/2.6<br>mmol/g <sub>met</sub> /min   | Stanley JNG, Heinroth F, Weber CC, Masters AF, Maschmeyer T. Robust bimetallic Pt-Ru catalysts for the rapid hydrogenation of toluene and tetralin at ambient temperature and pressure. Appl Catal a-Gen. 2013;454:46-52.                                   |

|              |                                                                           |                                                                                                                            |                                         |                                                                                                                                                                                                                                                                 |
|--------------|---------------------------------------------------------------------------|----------------------------------------------------------------------------------------------------------------------------|-----------------------------------------|-----------------------------------------------------------------------------------------------------------------------------------------------------------------------------------------------------------------------------------------------------------------|
| 36           | Pt/TiO <sub>2</sub> -SiO <sub>2</sub><br>(Pt 5.0wt%)                      | T=200 °C ,<br>catalyst<br>weight=0.5 g,<br>hydrogen<br>pressure =1 MPa,<br>100 mL<br>stainless-steel<br>autoclave          | Small/0.6<br>mmol/g <sub>Pt</sub> /min  | Gonda M, Ohshima M-a,<br>Kurokawa H, Miura H.<br>Toluene hydrogenation over<br>Pd and Pt catalysts as a<br>model hydrogen storage<br>process using low grade<br>hydrogen containing catalyst<br>inhibitors. Int J Hydrog<br>Energy. 2014; 39(29): 16339-<br>46. |
| 37           | Pt-Pd/SiO <sub>2</sub> -<br>Al <sub>2</sub> O <sub>3</sub><br>(Pt 0.2wt%) | T=150 °C ,<br>catalyst<br>weight=5 g,<br>hydrogen<br>pressure =2 MPa,<br>fixed bed                                         | 88%/407mmol/g <sub>Pt</sub> /m<br>in    | Kumar SAK, John M, Pai<br>SM, Niwate Y, Newalkar BL.<br>Low temperature<br>hydrogenation of aromatics<br>over Pt-Pd/SiO <sub>2</sub> -Al <sub>2</sub> O <sub>3</sub><br>catalyst. Fuel Processing<br>Technology. 2014; 128:303-<br>9.                           |
| 38           | Pt/Al <sub>2</sub> O <sub>3</sub> -<br>HUSY<br>(Pt 0.37wt%)               | T=110 °C ,<br>H <sub>2</sub> /toluene=45,<br>P=0.1MPa                                                                      | <15%/144<br>mmol/g <sub>Pt</sub> /min   | Mendes PSF, Gregorio AFC,<br>Daudin A, Bouchy C, Silva<br>JM, Ribeiro MF. Elucidation<br>of the zeolite role on the<br>hydrogenating activity of Pt-<br>catalysts. Catal Commun.<br>2017; 89:152-5.                                                             |
| this<br>work | Pt/S-1<br>(Pt 0.3 wt%)                                                    | T=150 °C ,<br>n(H <sub>2</sub> )/n(toluene)<br>≈3.1, P (H <sub>2</sub> )<br>=1.5MPa, 70 mL<br>stainless-steel<br>autoclave | ~100%/1271<br>mmol/g <sub>Pt</sub> /min | This work                                                                                                                                                                                                                                                       |

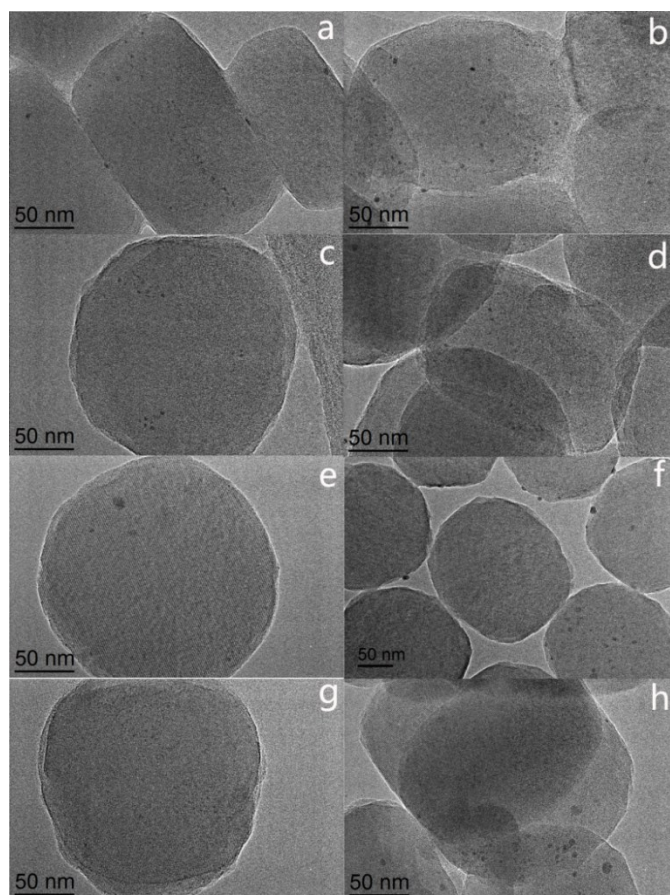

Fig. S2 TEM images of fresh and spent catalysts: Pt/S-1(a, b), Cu-Pt/S-1 (c, d), spent Pt/S-1 (e, f) (after reaction 10 hours at 350 °C) and spent Cu-Pt/S-1 (g, h) (after reaction 10 hours at 350 °C).

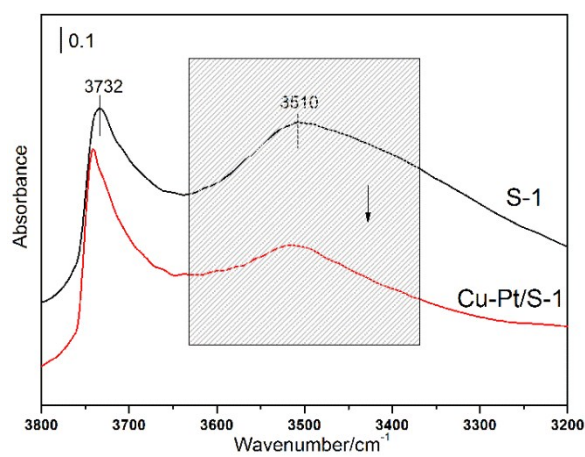

Fig. S3 Hydroxyl IR spectrums of S-1 and reduced Cu-Pt/S-1.

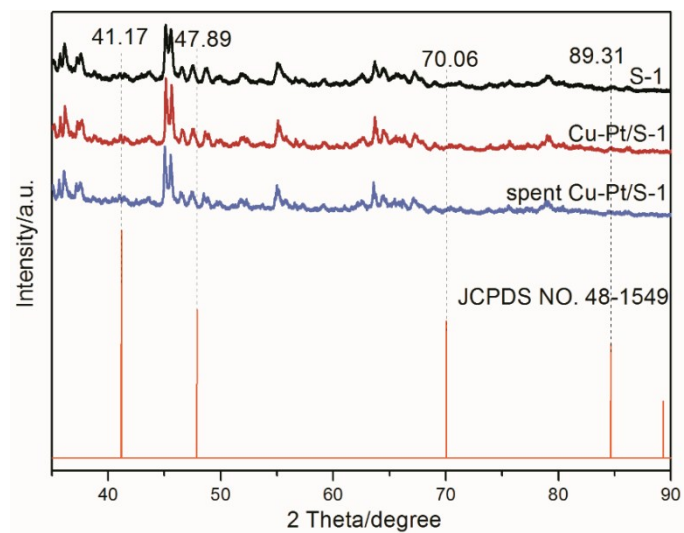

Fig. S4 X-ray diffraction patterns of Cu-Pt/S-1, spent Cu-Pt/S-1, S-1 and CuPt alloy (JCPDS NO.48-1549).
